# Supplementary material for: TβRII Regulates the Proliferation of Metanephric Mesenchyme Cells through Six2 In Vitro
Source: Int J Mol Sci. 2017 Apr 18;18(4):853. doi: 10.3390/ijms18040853 (PMC5412437; doi:10.3390/ijms18040853)
Supplement: Supplementary file 1 [file ijms-18-00853-s001.xlsx]

## Sheet: Table S1
Table S1. The sequences of siRNA
siRNA name	Sense	Antisense
siTβRII (mus)	GUGCCUGUAACAUGGAAGATT	UCUUCCAUGUUACAGGCACTT
siCTL	UUCUCCGAACGUGUCACGUTT	ACGUGACACGUUCGGAGAATT

## Sheet: Table S2
Table S2. The sequences of the primers
Primer Name	Sequences
Smad3.cds	F: CTTGGTACCGAGCTCCGGGATCATACATGAATACTACG
	R: TGCTGGATATCTGCA TCCCTCATGTCATCTACTGCC
Six2.cds	F: CTTGGTACCGAGCTCCACCATGTCCATGCTGCCCACCTT
	R: TGCTGGATATCTGCAGGCAGATCGTCAGTCAGTCA
Smad3. primer1-real time	F: CAGTGACCACCAGATGAACC
	R: AGTAGGTGACTGGCTGTAGG
Smad3. primer2-real time	F: ACCAAGTGCATTACCATCCC
	R: CGTAATTCATGGTGGCTGTG
Smad3. primer3-real time	F: AACCAGGGCTTTGAGGCTGT
	R: AAGCCACTGCAAGGGTCCAT
Six2.real time	F: GCCTGCGAGCACCTCCACAAGAAT
	R: CACCGACTTGCCACTGCCATTGAG
TβRII.real time	F: TGACTTCGGGCTGTCCTTGC
	R: CGTCTGCTTGAACGACTCCA
18s.real time	F: GTAACCCGTTGAACCCCATT
	R: CCATCCAATCGGTAGTAGCG
Six2.promoter	F: CGTGCTAGCCCGGGCTATTTCCCAGGTCCCCTGGAATCCT
	R: CCGGAATGCCAAGCTCTTGCAGCTTTTTTAATAATATTAT
